# Supplementary figures and images for: Food Safety Practices and Stunting among School-Age Children—An Observational Study Finding from an Urban Slum of Bangladesh
Source: MDPI journal article supplement (doi:10.3390/ijerph19138044), 2022-06-30

Flowchart of data collection-

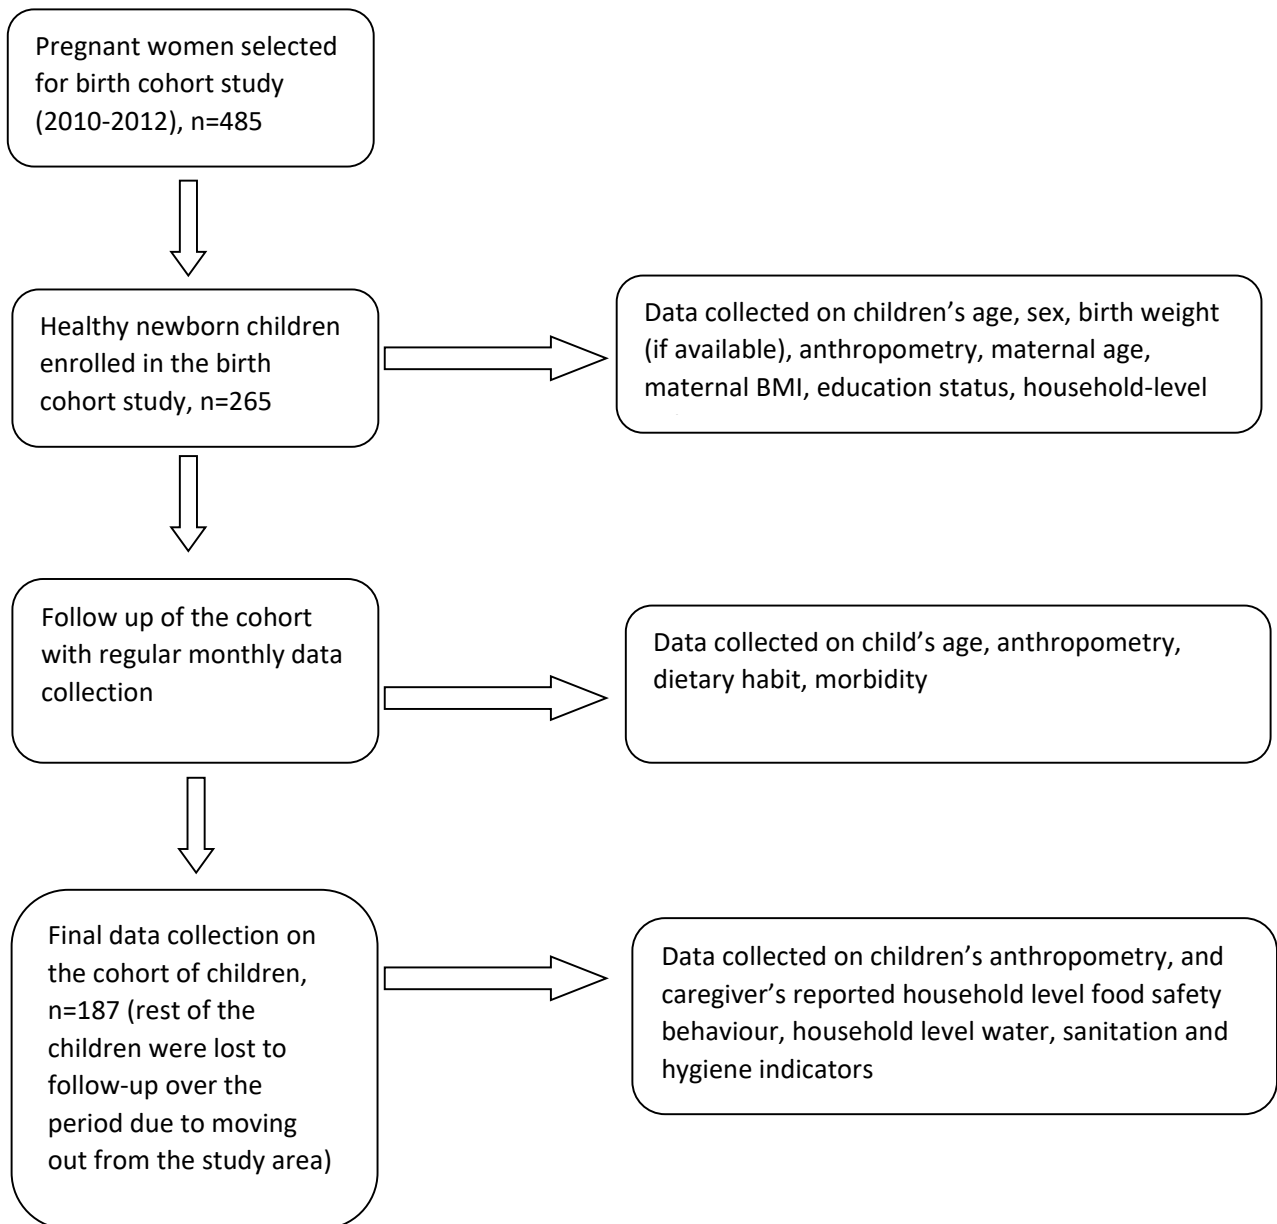

Supplement: s1 [file s1]
